# Supplementary material for: Preparation of hyaluronic acid-coated polymeric micelles for nasal vaccine delivery
Source: Royal Society of Chemistry journal article supplement (doi:10.1039/d1bm01985f), 2022-01-01
Supplement: d1bm01985f1.pdf [file d1bm01985f1.pdf]

## Electronic Supplementary Information (ESI)

# Preparation of hyaluronic acid-coated polymeric micelles for nasal vaccine delivery

Kengo Suzuki<sup>1</sup>, Yuta Yoshizaki<sup>2†</sup>, Kenta Horii<sup>1</sup>, Nobuo Murase<sup>2</sup>, Akinori Kuzuya<sup>1,3</sup>, Yuichi Ohya<sup>1,3\*</sup>

<sup>1</sup> Faculty of Chemistry, Materials, and Bioengineering, Kansai University, 3-3-35 Yamate, Suita, Osaka 564-8680, Japan

<sup>2</sup> Organization for Research and Development of Innovative Science and Technology (ORDIST), Kansai University, 3-3-35 Yamate, Suita, Osaka 564-8680, Japan

<sup>3</sup>Kansai University Medical Polymer Research Center (KUMP-RC), Kansai University, 3-3-35 Yamate, Suita, Osaka 564-8680, Japan

†Present address: Graduate School of Pharmaceutical Sciences, Tohoku University, 6-3 Aoba, Aramaki, Aoba-ku, Sendai, Miyagi 980-8578, Japan

**\*Corresponding author: Yuichi Ohya**

e-mail: yohya@kansai-u.ac.jp, TEL +81-6-6368-0818, FAX: +81-6-6339-4026

## INDEX

### Preparation of PLys<sup>+</sup>-b-PLLA

**Figure S1.** <sup>1</sup>H NMR spectrum of HO-PLLA.

**Figure S2.** <sup>1</sup>H NMR spectra of Boc-NH-PLLA and H<sub>2</sub>N-PLLA.

**Figure S3.** <sup>1</sup>H NMR spectra of PLys(Z)-b-PLLA and PLys<sup>+</sup>-b-PLLA.

**Figure S4.** Quantification of dendritic cell markers (CD11c<sup>+</sup>) of the collected bone marrow cells using a flow cytometer after treatment with R10 medium containing 10 ng/mL GM-CSF.

**Figure S5.** FCA of BMDCs with or without PE-labelled anti-MHC class II antibody staining.

**Figure S6.** Flow cytometric analysis (FCA) for BMDCs incubated with HA-micelle(OC) or Dex-micelle(OC) containing Rhodamine-labelled OVA and FAM-labelled CpG-DNA at 37°C for 4 h.

**Table S1.** Sequences of qPCR primers.

## Preparation of PLys<sup>+</sup>-*b*-PLLA

### Materials

L-Lactide, 1-dodecanol, Sn(Oct)<sub>2</sub>, *N*-(*tert*-butocycarbonyl)glycine (Boc-Gly-OH), *N,N'*-dicyclohexylcarbodiimide (DCC), 4-(dimethylamino)pyridine (DMAP), trifluoroacetic acid (TFA), triethylamine (TEA), 25% HBr/AcOH, diethyl ether, chloroform, methanol, *N,N*-dimethylformamide (DMF), chloroform-*d* (CDCl<sub>3</sub>), dimethyl sulfoxide (DMSO)-*d*<sub>6</sub> and other reagents were purchased from Fujifilm Wako Pure Chemical Corporation (Japan). *N*-Benzyloxycarbonyl-L-lysine *N*-carboxy anhydride (Lys(Z)-NCA) was purchased from Hodogaya Contract Laboratory Co. Ltd. (Japan). Hyaluronic acid sodium salt (*M*<sub>w</sub> = ~ 90,000 Da) was obtained from Kibun Food Chemifa Co., Ltd. (Japan). Water was purified using Millipore Elix UV3 direct-Q UV (Merck, Darmstadt, Germany).

### Measurements

<sup>1</sup>H-Nucleic magnetic resonance (NMR) spectra were obtained on a JNM-ECS400 or GSX-400 spectrometer (JEOL, Tokyo, Japan). The molecular weight was measured by size-exclusion chromatography (SEC) (Tosoh GPC-8020 series system; Tosoh TSKgel α-5000 or Tosoh GMH<sub>HR</sub>-H(S), Tosoh Corporation, Tokyo, Japan).

### Synthesis of poly(lactide with amino-terminal (H<sub>2</sub>N-PLLA))

We synthesised poly(lactide with an amino-terminal (H<sub>2</sub>N-PLLA)) by bulk ring-opening polymerisation of L-lactide, condensation with Boc-Gly-OH, and subsequent deprotection according to previous literature<sup>36,37</sup>.

First, L-lactide (69.4 mmol, 10.0 g), 1-dodecanol (2.31 mmol, 430 mg), and Sn(Oct)<sub>2</sub> (69.4 μmol, 28.1 mg) were placed in a flask with stopcock and dried under reduced pressure for 6 hours. After melting in an oil bath at 150°C, bulk ring-opening polymerisation was carried out at 120°C for 9 h. The reaction mixture was dissolved in a small amount of chloroform and re-precipitated using a mixture of chloroform and diethyl ether (1:20). The precipitate was collected via suction filtration and dried under reduced pressure. Poly(lactide with free OH terminal (and dodecyl ester terminal) (HO-PLLA)) was obtained as a white solid (yield: 88%). <sup>1</sup>H-NMR spectrum is shown in **Figure S1**. *M*<sub>w</sub> = 7,100, *M*<sub>n</sub> = 5,500, *M*<sub>w</sub>/*M*<sub>n</sub>: 1.30 estimated by SEC.

Boc-Gly-OH (3.0 mmol, 0.53 g) and DCC (3.7 mmol, 0.76 g) were separately dissolved in dry methylene chloride (2.17 mL for Boc-Gly-OH and 3.05 mL for DCC). The DCC solution was added dropwise to the Boc-Gly OH solution, and the mixture was stirred for 1 h in an ice bath. In another flask, HO-PLLA (0.75 mmol, 3.00 g) and DMAP (0.41 mmol, 50.0 mg) were dissolved in dry methylene chloride (20.5 mL). The solution of HO-PLLA and DMAP was added to the Boc-Gly-OH and DCC solution at room temperature. The mixture was stirred for 24 h, and the dicyclohexylurea residue was removed by suction filtration. The product (Boc-NH-PLLA) was dissolved in a small amount of chloroform and re-precipitated using chloroform and diethyl ether (1:20). The precipitate was collected via suction filtration and dried under reduced pressure (Yield: 81%). <sup>1</sup>H-NMR spectrum is shown in **Figure S2**. *M*<sub>w</sub> = 6,500, *M*<sub>n</sub> = 5,700, *M*<sub>w</sub>/*M*<sub>n</sub> = 1.14 estimated by SEC.

Boc-NH-PLLA (542 μmol, 2.21 g) in a flask was dried for 4 h under reduced pressure and dissolved in dry methylene chloride (15 mL) under a nitrogen atmosphere. TFA (81 mmol, 6.2 mL) was then added to the flask and stirred for 1 h at 0°C in an ice bath. After the reaction, reprecipitation was performed three times with chloroform and hexane (1:20). A white solid was obtained after drying under reduced pressure. The product (H<sub>2</sub>N-PLLA TFA salt) was dissolved in dry methylene chloride (12 mL), and TEA was added to the solution in an ice bath for desalting. The reaction mixture was stirred for 1 min. Reprecipitation was performed thrice with chloroform and hexane (1:20).

After drying under reduced pressure, H<sub>2</sub>N-PLLA was obtained as a white solid (yield: 79%). The <sup>1</sup>H NMR spectrum is shown in **Figure S2**.  $M_w = 5,700$ ,  $M_n = 5,000$ ,  $M_w/M_n = 1.31$  estimated by SEC.

### **Synthesis of PLys<sup>+</sup>-b-PLLA**

The synthesis of the diblock copolymer of poly(L-lysine) and polylactide, PLys<sup>+</sup>-b-PLLA, was carried out by ring-opening polymerisation of Lys(Z)-NCA using the obtained H<sub>2</sub>N-PLLA as a macro-initiator and subsequent deprotection according to a method reported previously<sup>36,37</sup>.

H<sub>2</sub>N-PLLA (386 μmol, 1.35 g) and Lys(Z)-NCA (11.6 mmol, 3.54 g) were dried at reduced pressure for 7 h. H<sub>2</sub>N-PLLA was dissolved in dry chloroform (20.2 mL) in two-necked flasks and stirred in an oil bath at 40°C. Then, a Lys(Z)-NCA solution in chloroform (3.4 mL) was added to initiate the polymerisation. The reaction was carried out at 40°C for 24 h under a nitrogen atmosphere. After the reaction, the products were reprecipitated three times using a mixture of diethyl ether and methanol (10:1), owing to the poor solubility of the product in this mixture. The precipitate was collected via centrifugation and dried under reduced pressure to obtain a white solid of PLys(Z)-b-PLLA (yield: 70%). <sup>1</sup>H-NMR spectrum is shown in **Figure. S3**.  $M_w = 13,000$ ,  $M_n = 10,000$ ,  $M_w/M_n = 1.3$  estimated by SEC.

The benzyloxycarbonyl(Z) group of PLys(Z)-b-PLLA was removed as follows: PLys(Z)-b-PLLA (56.7 μmol, 681 mg) was dried under vacuum overnight and then dissolved in TFA (6.1 mL) in a flask equipped with a calcium chloride tube. HBr/AcOH (25%, 18.7 mmol, 4.4 mL (10 eq of Z group)) was added to this solution. The ice-cooled reaction mixture was stirred at 0°C for 30 min. After the reaction, the products were precipitated with diethyl ether. The precipitate was collected *via* centrifugation and dried under reduced pressure to obtain a white solid (yield: 80%). The degree of deprotection of the Z group was estimated to be 96% using <sup>1</sup>H-NMR spectroscopy. <sup>1</sup>H-NMR spectrum is shown in **Figure. S3**.  $M_w = 9,000$ ,  $M_n = 7,500$ ,  $M_w/M_n = 1.20$  estimated by SEC.

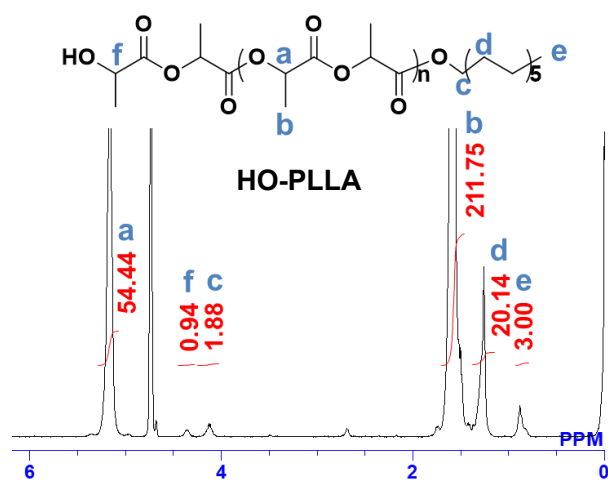

Figure S1.  $^1\text{H}$  NMR spectrum of HO-PLLA. (Solvent:  $\text{CDCl}_3$ )

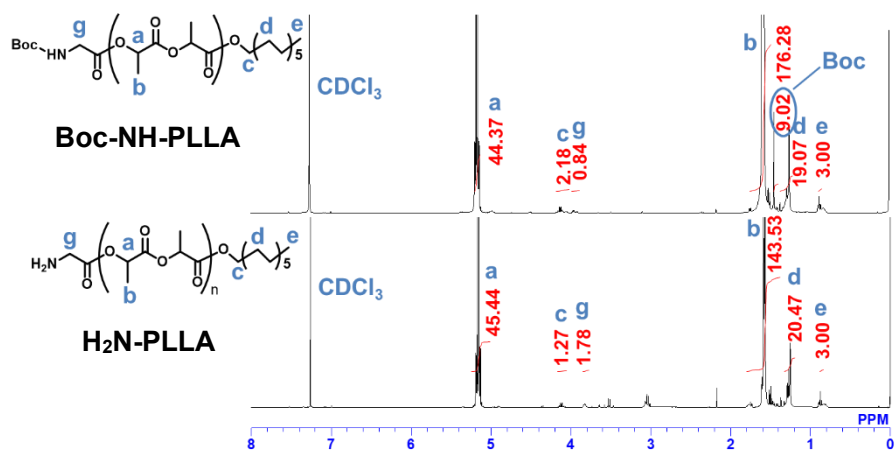

Figure S2.  $^1\text{H}$  NMR spectra of Boc-NH-PLLA and  $\text{H}_2\text{N}$ -PLLA. (Solvent:  $\text{CDCl}_3$ )

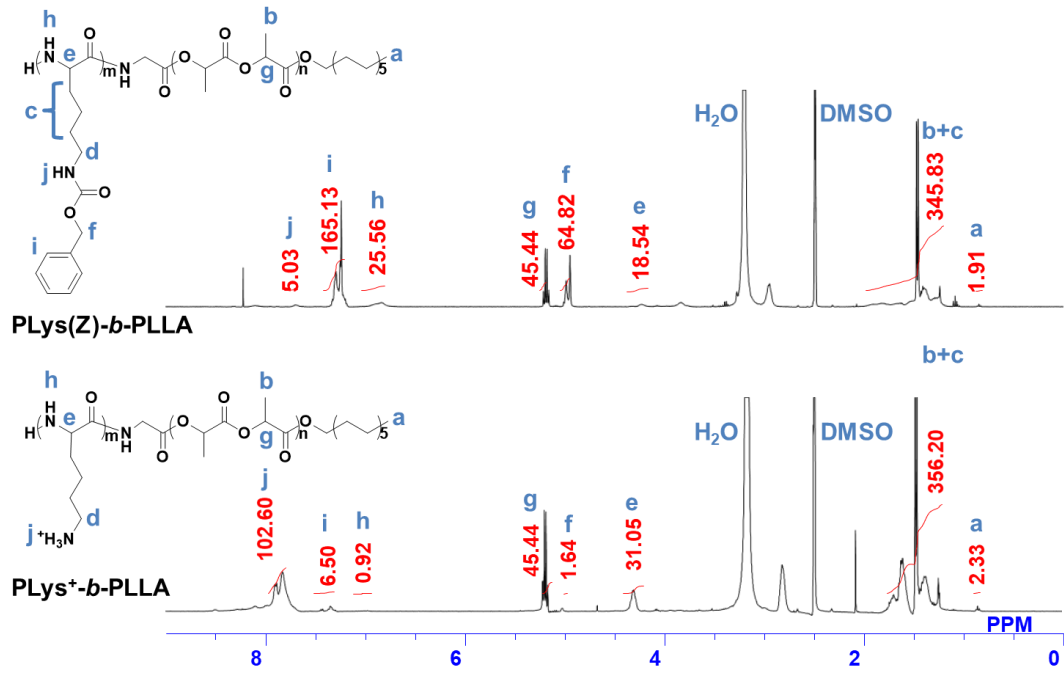

**Figure S3.** <sup>1</sup>H NMR spectra of PLys(Z)-b-PLLA and PLys<sup>+</sup>-b-PLLA. (Solvent: CDCl<sub>3</sub>)

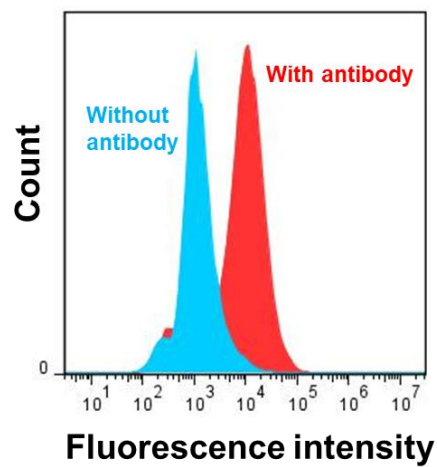

**Figure S4.** Quantification of dendritic cell markers (CD11c<sup>+</sup>) of the collected bone marrow cells using a flow cytometer after treatment with R10 medium containing 10 ng/mL GM-CSF.

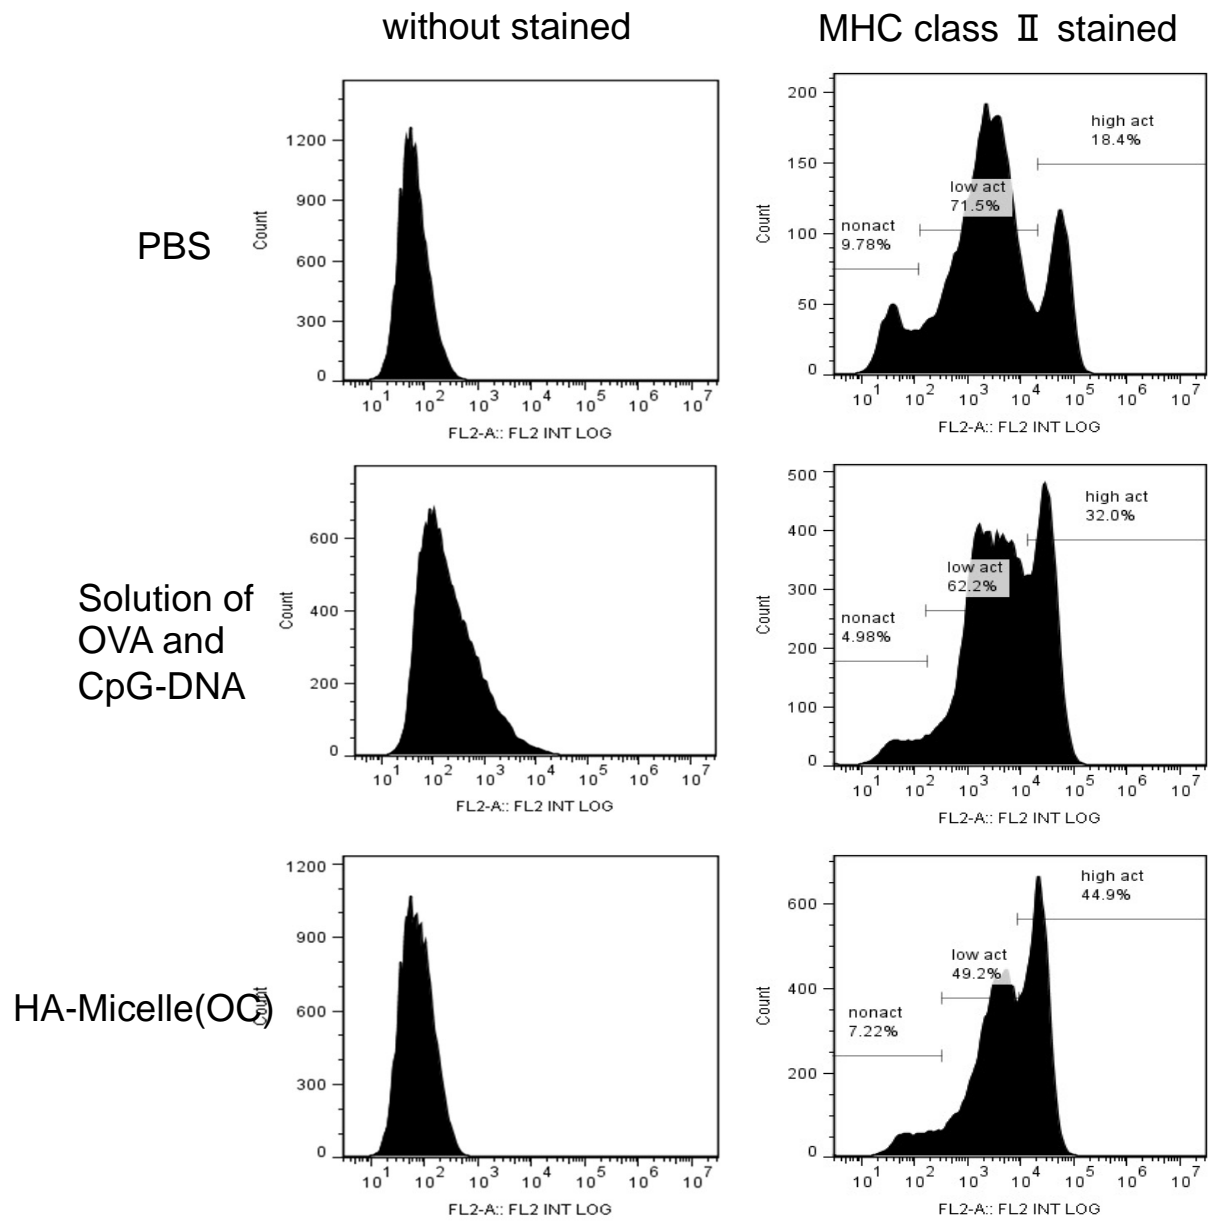

**Figure S5.** FCA of BMDCs with or without PE-labelled anti-MHC class II antibody staining. Cells were incubated with HA micelles (OC), an aqueous solution of OVA and CpG-DNA or PBS in RPMI-1640 containing 5% FBS for 24 h at 37°C.

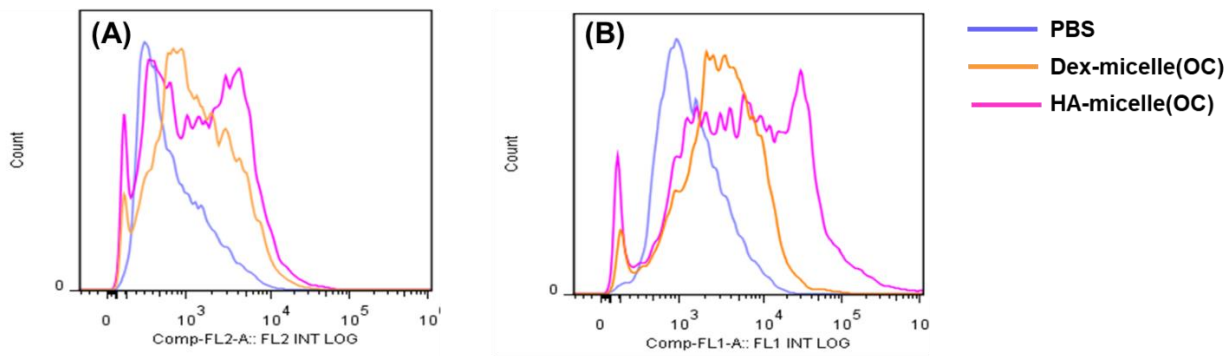

**Figure S6.** Flow cytometric analysis (FCA) for BMDCs incubated with HA-micelle(OC) or Dex-micelle(OC) containing Rhodamine-labelled OVA and FAM-labelled CpG-DNA at 37°C for 4 h. (A) Rhodamine B detection (OVA), (B) FAM detection (CpG-DNA).

**Table S1.** Sequences of qPCR primers

| Primers        |         | Sequences                      | References |
|----------------|---------|--------------------------------|------------|
| IL-4           | forward | 5'-ATGGGTCTCAACCCCCAGCTAGT-3'  | [1]        |
|                | reverse | 5'-GCTCTTTAGGCTTTCCAGGAAGTC-3' |            |
| IFN- $\gamma$  | forward | 5'-TGAACGCTACACACTGCATCTTGG-3' | [2]        |
|                | reverse | 5'-CGACTCCTTTTCCGCTTCCTGAG-3'  |            |
| $\beta$ -Actin | forward | 5'-TGAATCCTGTGGCATCCATGAAA-3'  | [2]        |
|                | reverse | 5'-TGAACGCTACACACTGCATCTTGG-3' |            |

[1] M. Galdiero, A. Marcatili, G. Cipollaro del'ero, I. Nuzzo, C. Bentivoglio, M. Galdiero, C. R. Carratelli, Effect of transforming growth factor  $\beta$  on experimental *Salmonella typhimurium* infection in mice, *Infect. Immun.*, **1999**, 67, 1432-1438.

[2] L. Huang, F. Chen, Y. Chen, Y. Lin, J. T. Kung, Potent induction of long-term CD8<sup>+</sup> T cell memory by short-term IL-4 exposure during T cell receptor stimulation, *Proc. Natl. Acad. Sci. USA.*, **2000**, 97, 3406-3411.
